# Supplementary material for: Complexation of Bi(iii) with 3-mercaptopropionic acid in aqueous solutions: a combined experimental and theoretical study
Source: Royal Society of Chemistry journal article supplement (doi:10.1039/c4ra07572b), 2014-01-01
Supplement: c4ra07572b1.pdf [file c4ra07572b1.pdf]

Supplementary

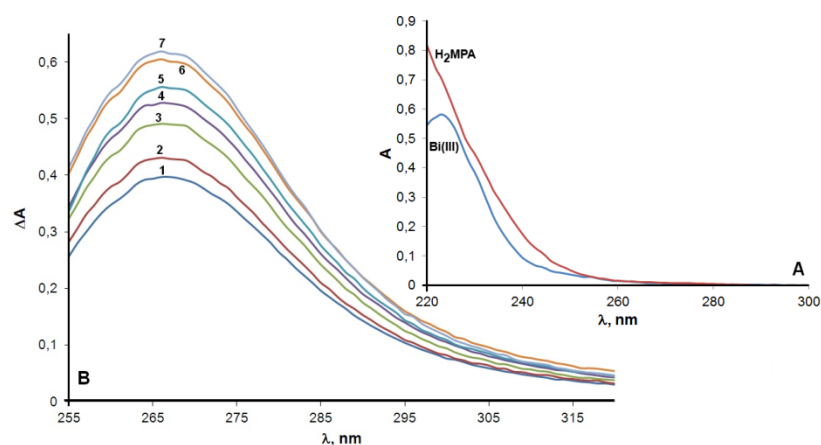

Figure S1. The UV-Vis spectra of Bi ( $2.5 \cdot 10^{-4}$  M) and of  $H_2MPA$  ( $3.0 \cdot 10^{-3}$  M) (A),  $\Delta A$  versus  $\lambda$  (B) plots for Bi(III)- $H_2MPA$  system:  $C_{Bi} \cdot 10^{-3}$  M: 1.5(1); 2.0 (2); 3.0 (3); 4.0 (4); 5.0 (5); 10.0 (6); 20.0 (7).  $C(H_2MPA) = 1.5 \cdot 10^{-4}$  M. 0.5 M  $HClO_4$ .  $I = 0.5$  ( $HClO_4$ ). 298 K.  $l = 1$  cm

Table S1. Absorbance data for Bi(III)- $H_2MPA$  system in perchloric aqueous solutions. ( $C_{H_2L} = 1.5 \cdot 10^{-4}$  M;  $\lambda = 267$  nm; 298 K)

| $C_{Bi}, M$         | A in:                               |                |                                 |                                     |              |              |
|---------------------|-------------------------------------|----------------|---------------------------------|-------------------------------------|--------------|--------------|
|                     | 0.5 M $HClO_4$ +<br>0.5 M $NaClO_4$ | 0.5 M $HClO_4$ | 1 M $HClO_4$ +<br>1 M $NaClO_4$ | 0.5 M $HClO_4$ +<br>1.5 M $NaClO_4$ | 1 M $HClO_4$ | 2 M $HClO_4$ |
| $1.5 \cdot 10^{-3}$ | 0.389                               | 0.401          | 0.321                           | 0.436                               | 0.230        | 0.190        |
| $2 \cdot 10^{-3}$   | 0.439                               | 0.446          | 0.364                           | 0.531                               | 0.315        | 0.231        |
| $3 \cdot 10^{-3}$   | 0.515                               | 0.503          | 0.445                           | 0.575                               | 0.380        | 0.335        |
| $4 \cdot 10^{-3}$   | 0.546                               | 0.540          | 0.482                           | 0.614                               | 0.443        | 0.360        |
| $5 \cdot 10^{-3}$   | 0.561                               | 0.582          | 0.508                           | 0.648                               | -            | 0.387        |
| $6 \cdot 10^{-3}$   | 0.582                               | -              | 0.540                           | -                                   | 0.497        | -            |
| 0.01                | 0.640                               | 0.624          | 0.608                           | -                                   | 0.554        | 0.490        |
| 0.02                | 0.673                               | 0.66           | 0.672                           | 0.726                               | 0.610        | 0.575        |

Table S2. Absorbance data for isomolar series for  $C_{Bi} = 2.5 \cdot 10^{-4}$  M ( $I = 0.5$  ( $HClO_4$ ), 298 K,  $l = 1$  cm,  $\lambda = 267$  nm) at different acidities

| $C(H_2MPA) \cdot 10^{-3}, M$ | 0.5M $HClO_4$ | 1.0M $HClO_4$ | 2.0M $HClO_4$ |
|------------------------------|---------------|---------------|---------------|
| 0.15                         | 0.134         | 0.098         | 0.057         |
| 0.25                         | 0.210         | 0.148         | 0.073         |
| 0.30                         | 0.291         | -             | 0.089         |
| 0.40                         | 0.357         | 0.220         | 0.128         |
| 0.50                         | 0.365         | 0.267         | 0.156         |
| 0.60                         | 0.469         | 0.311         | 0.184         |
| 0.70                         | 0.523         | 0.343         | 0.208         |
| 0.80                         | 0.594         | 0.380         | 0.230         |
| 1.00                         | -             | 0.470         | 0.284         |
| 1.25                         | 0.759         | 0.537         | 0.333         |

|      |       |       |       |
|------|-------|-------|-------|
| 1.50 | 0.750 | 0.635 | 0.383 |
| 2.00 | 0.875 | 0.749 | 0.456 |
| 2.50 | 0.936 | 0.819 | 0.563 |
| 3.00 | 1.024 | 0.888 | 0.610 |
| 4.00 | 1.137 | 1.033 | 0.690 |
| 4.50 | 1.196 | 1.083 | 0.736 |

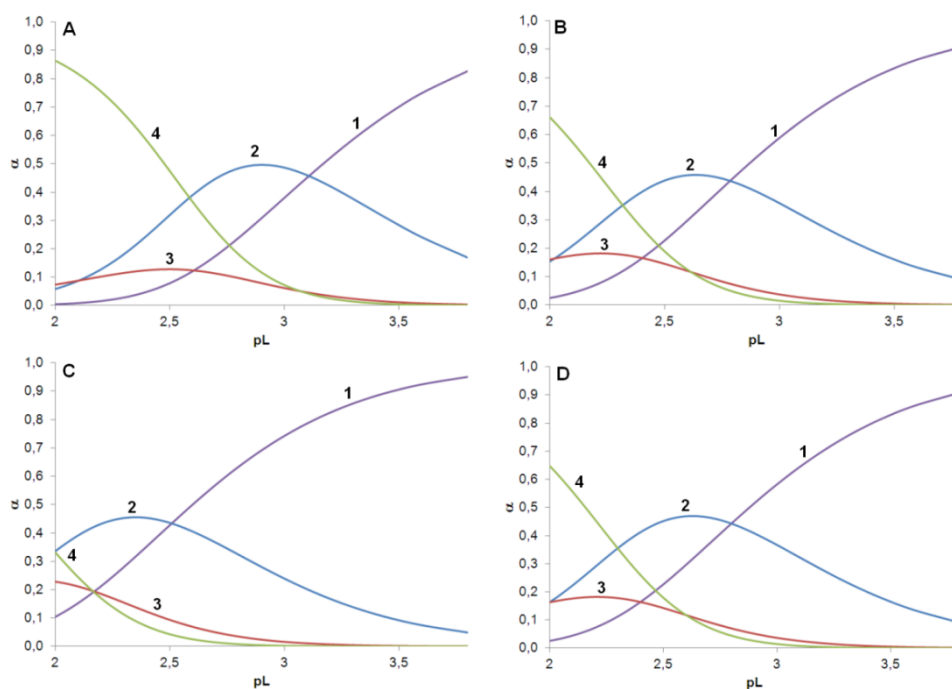

Figure S2. Distribution diagrams obtained from experimental conditional stability constants at different acidities ( $\text{HClO}_4$ ): 0.5 M (A), 1.0 M (B), 2.0 M (C) and from «true» stability constant obtained excluding protonation of ligand; 1 –  $[\text{M}]$ , 2 –  $[\text{M}(\text{HL})]$ , 3 –  $[\text{M}(\text{HL})_2]$ , 4 –  $[\text{M}(\text{HL})_3]$

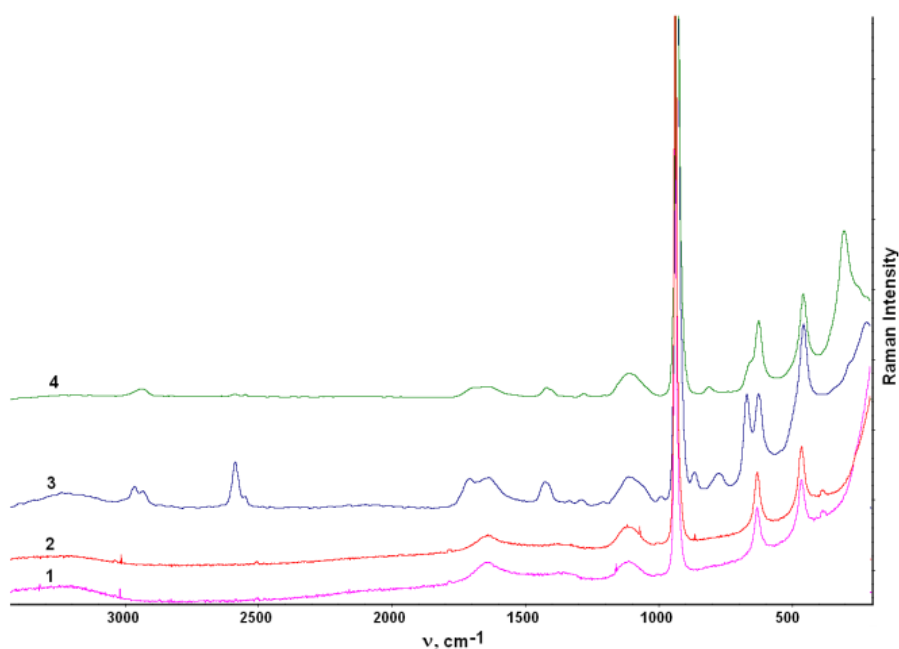

Figure S3. Raman spectra of aqueous solutions: 1 –  $\text{HClO}_4$ ; 2 –  $\text{Bi}(\text{III})/\text{HClO}_4$ ; 3 –  $\text{H}_2\text{MPA}/\text{HClO}_4$ ; 4 –  $\text{Bi}(\text{III})/\text{HClO}_4/\text{H}_2\text{MPA}$  at  $C_{\text{Bi}(\text{III})} = 0.1 \text{ M}$ ,  $C_{\text{H}_2\text{MPA}} = 0.3 \text{ M}$ ,  $C_{\text{HClO}_4} = 0.8 \text{ M}$

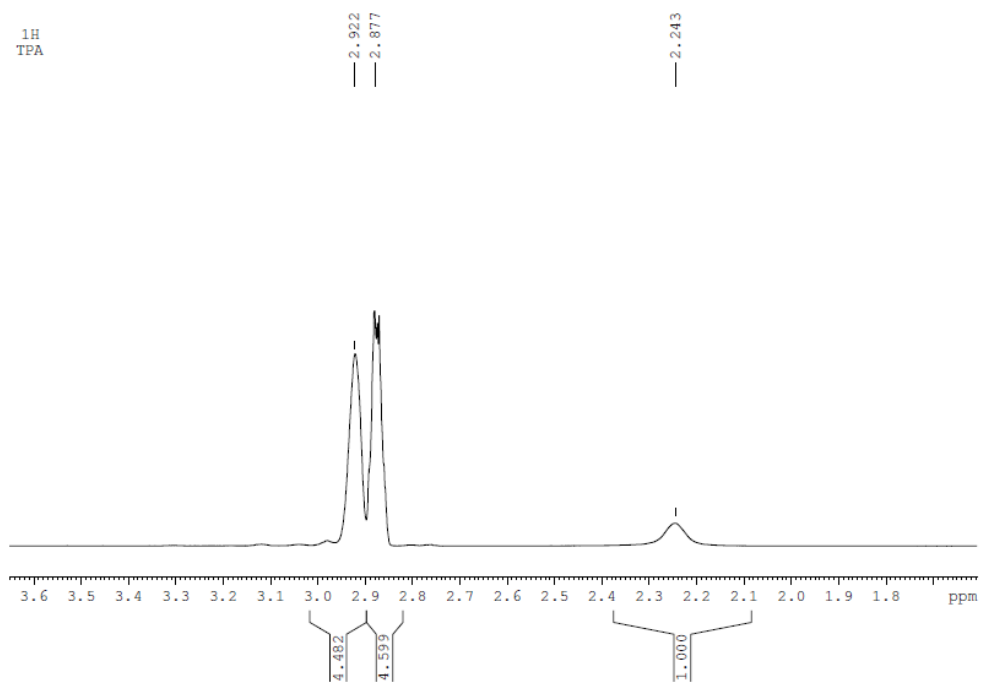

Figure S4.  $^1\text{H-NMR}$  spectrum of  $\text{H}_2\text{MPA}$  in aqueous perchloric solution at  $C_{\text{H}_2\text{MPA}} = 0.3 \text{ M}$  and  $C_{\text{HClO}_4} = 0.8 \text{ M}$

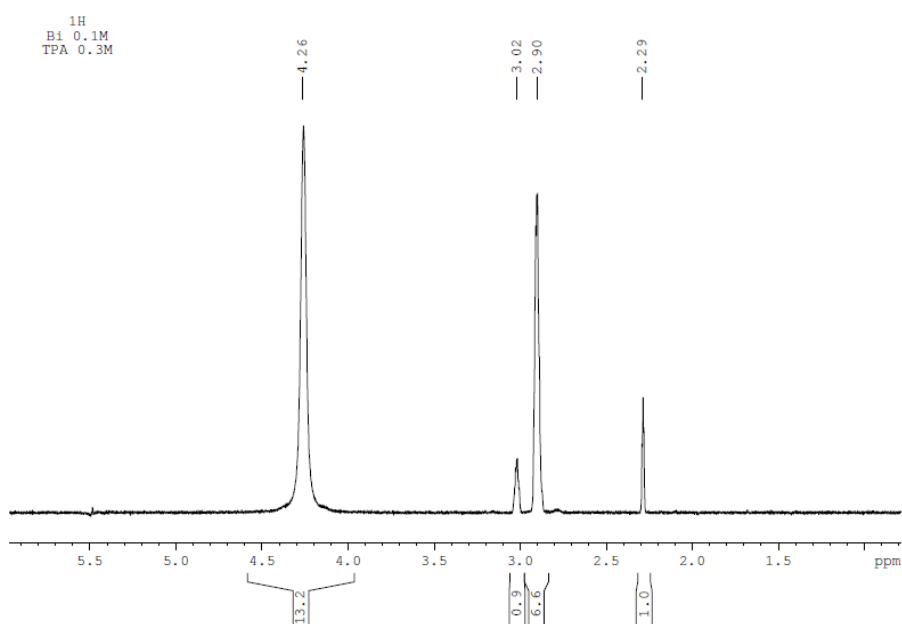

Figure S5.  $^1\text{H-NMR}$  spectrum of  $\text{Bi-H}_2\text{MPA}$  system in aqueous perchloric solution at  $C_{\text{Bi}} = 0.1 \text{ M}$ ,  $C_{\text{H}_2\text{MPA}} = 0.3 \text{ M}$  and  $C_{\text{HClO}_4} = 0.8 \text{ M}$

Table S3. Free Gibbs energies for the thermodynamic cycle (Def2-TZVPP)

| Name                                                                         | DFT | $E$ , a.u.   | ZPE, a.u. | $E(\text{SMD})$ , a.u. |
|------------------------------------------------------------------------------|-----|--------------|-----------|------------------------|
| $\text{Bi}(\text{HMPA})(\text{H}_2\text{O})_3 \cdot \text{H}_2\text{O}^{2+}$ | M06 | -1185.86438  | 0.182145  | -1186.132349           |
| $\text{H}_2\text{MPA}$                                                       |     | -666.5386745 | 0.090247  | -666.547042            |
| $\text{Bi}(\text{H}_2\text{O})_6^{3+}$                                       |     | -672.2114887 | 0.14852   | -672.8580632           |
| $\text{Bi}(\text{HMPA})_2(\text{H}_2\text{O})_2^+$                           |     | -1699.297751 | 0.216948  | -1699.376401           |
| $\text{Bi}(\text{HMPA})_3$                                                   |     | -2212.611974 | 0.249362  | -2212.633585           |

|                                                                         |              |              |              |              |
|-------------------------------------------------------------------------|--------------|--------------|--------------|--------------|
| H <sub>5</sub> O <sub>2</sub> <sup>+</sup>                              |              | -153.1876838 | 0.058614     | -153.3037497 |
| H <sub>7</sub> O <sub>3</sub> <sup>+</sup>                              |              | -229.6506778 | 0.08316      | -229.7528162 |
| Bi(HMPA) <sub>2</sub> <sup>+</sup>                                      |              | -1546.404442 | 0.167313     | -1546.482211 |
| Bi(HMPA)(H <sub>2</sub> O) <sub>3</sub> *H <sub>2</sub> O <sup>2+</sup> | PBE0         | -1185.389495 | 0.182601     | -1185.656379 |
| H <sub>2</sub> MPA                                                      |              | -666.2818727 | 0.090695     | -666.2906751 |
| Bi(H <sub>2</sub> O) <sub>6</sub> <sup>3+</sup>                         |              | -671.8964779 | 0.147221     | -672.5459324 |
| H <sub>5</sub> O <sub>2</sub> <sup>+</sup>                              |              | -153.0999499 | 0.058187     | -153.216463  |
| Bi(HMPA)(H <sub>2</sub> O) <sub>3</sub> <sup>2+</sup>                   |              | -1108.970613 | 0.15784      | -1109.250898 |
| H <sub>7</sub> O <sub>3</sub> <sup>+</sup>                              |              | -229.5209997 | 0.083421     | -229.6240611 |
| Bi(HMPA)(H <sub>2</sub> O) <sub>3</sub> *H <sub>2</sub> O <sup>2+</sup> |              | M11          | -1185.781204 | 0.182377     |
| H <sub>2</sub> MPA                                                      | -666.5881588 |              | 0.090645     | -666.598183  |
| Bi(H <sub>2</sub> O) <sub>6</sub> <sup>3+</sup>                         | -672.1034781 |              | 0.149347     | -672.7559622 |
| H <sub>5</sub> O <sub>2</sub> <sup>+</sup>                              | -153.2163793 |              | 0.055949     | -153.3329846 |
| Bi(HMPA)(H <sub>2</sub> O) <sub>3</sub> *H <sub>2</sub> O <sup>2+</sup> | M06L         | -1186.178309 | 0.182143     | -1186.444925 |
| H <sub>2</sub> MPA                                                      |              | -666.6695429 | 0.090589     | -666.6776181 |
| Bi(H <sub>2</sub> O) <sub>6</sub> <sup>3+</sup>                         |              | -672.441899  | 0.14832      | -673.0889467 |
| H <sub>5</sub> O <sub>2</sub> <sup>+</sup>                              |              | -153.2315955 | 0.0589       | -153.3475307 |
| Bi(HMPA)(H <sub>2</sub> O) <sub>3</sub> *H <sub>2</sub> O <sup>2+</sup> | M11L         | -1186.21161  | 0.184411     | -1186.478167 |
| H <sub>2</sub> MPA                                                      |              | -666.6307722 | 0.090289     | -666.6384018 |
| Bi(H <sub>2</sub> O) <sub>6</sub> <sup>3+</sup>                         |              | -672.4945767 | 0.152096     | -673.1517915 |
| H <sub>5</sub> O <sub>2</sub> <sup>+</sup>                              |              | -153.2191984 | 0.059409     | -153.3359381 |

Table S4. Percentage composition of Bi(H<sub>2</sub>O)<sub>3</sub>(HMPA)<sub>2</sub><sup>+</sup>.H<sub>2</sub>O and Bi(HMPA)<sub>3</sub> molecular orbitals

| Compounds                                                                            | MO     | Energy, eV | Bi                                                   | ΣS                                                                               |
|--------------------------------------------------------------------------------------|--------|------------|------------------------------------------------------|----------------------------------------------------------------------------------|
| Bi(H <sub>2</sub> O) <sub>3</sub> (HMPA) <sub>2</sub> <sup>+</sup> .H <sub>2</sub> O | HOMO   | -7.769     | -                                                    | 47.66 (3p <sub>x</sub> )<br>15.20 (3p <sub>y</sub> )<br>10.54 (3p <sub>z</sub> ) |
|                                                                                      | LUMO   | -2.076     | 43.28 (6p <sub>x</sub> )<br>12.63 (6p <sub>z</sub> ) | -                                                                                |
| Bi(H <sub>2</sub> O) <sub>3</sub> (HMPA) <sub>2</sub> <sup>+</sup>                   | HOMO-1 | -6.904     | -                                                    | 59.56 (3p <sub>y</sub> )                                                         |
|                                                                                      | HOMO   | -6.819     | -                                                    | 13.58 (3p <sub>x</sub> )<br>34.74 (3p <sub>y</sub> )<br>20.46 (3p <sub>z</sub> ) |
|                                                                                      | LUMO+1 | -1.148     | 17.46 (6p <sub>z</sub> )                             | -                                                                                |
|                                                                                      | LUMO+2 | -1.075     | 4.69 (6p <sub>x</sub> )<br>17.66 (6p <sub>y</sub> )  | -                                                                                |
| Bi(HMPA) <sub>3</sub>                                                                | HOMO-1 | -6.476     | -                                                    | 36.92 (3p <sub>x</sub> )<br>26.66 (3p <sub>y</sub> )<br>9.04 (3p <sub>z</sub> )  |
|                                                                                      | HOMO   | -6.223     | -                                                    | 21.96 (3p <sub>x</sub> )<br>20.49 (3p <sub>y</sub> )<br>25.80 (3p <sub>z</sub> ) |
|                                                                                      | LUMO   | -0.770     | 32.20 (6p <sub>y</sub> )                             | -                                                                                |
|                                                                                      | LUMO+1 | -0.754     | 35.60 (6p <sub>x</sub> )                             | -                                                                                |
|                                                                                      | LUMO+2 | -0.487     | 30.47 (6p <sub>z</sub> )                             | -                                                                                |

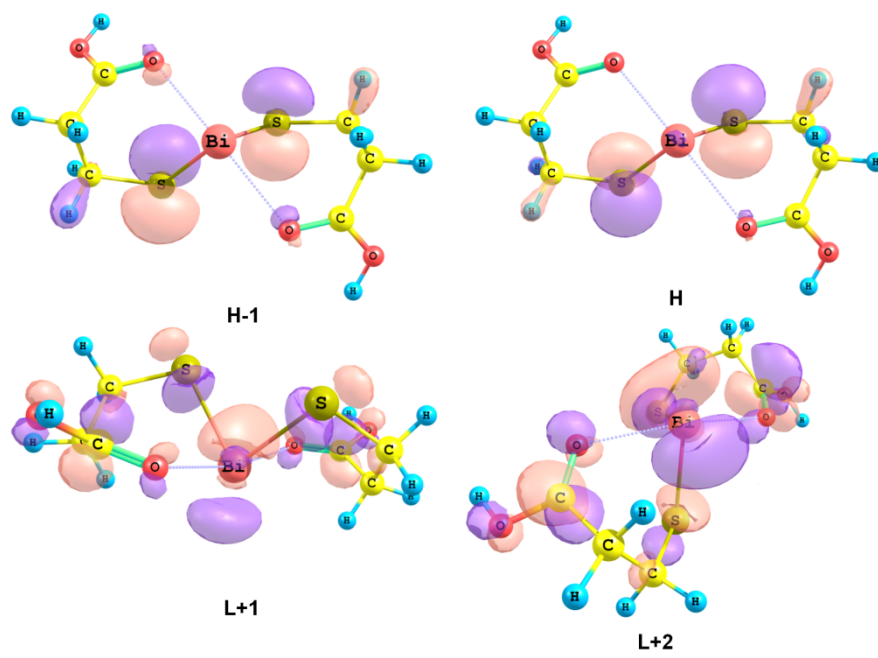

Fig. S6. Rendered MO of  $\text{Bi}(\text{HMPA})_2$

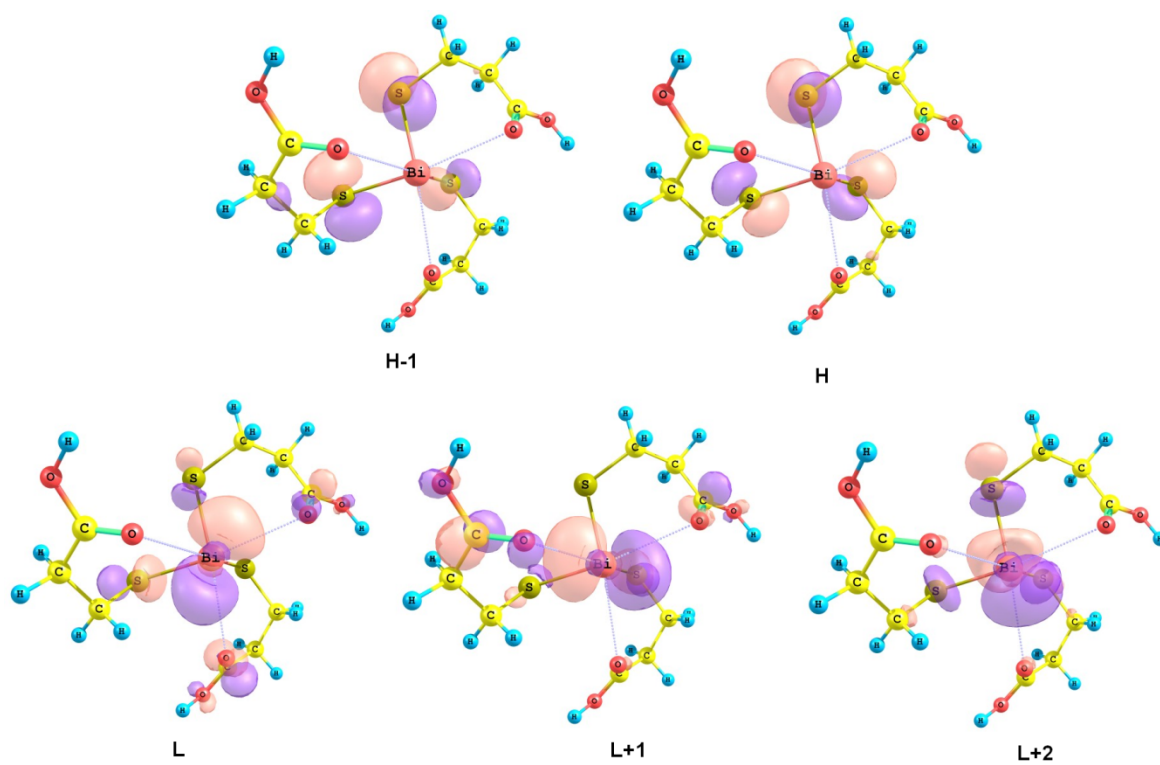

Fig. S7. Rendered MO of  $\text{Bi}(\text{HMPA})_3$

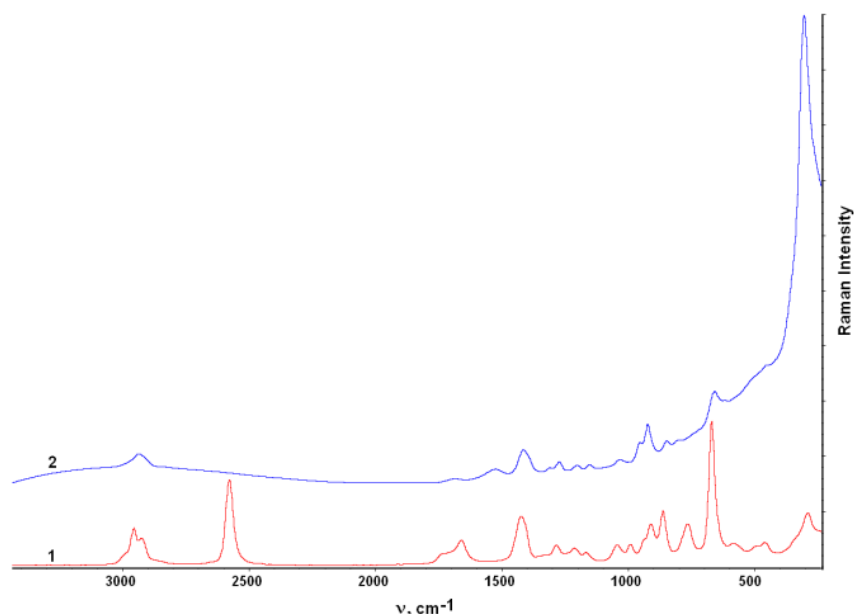

Figure S8. Raman spectra of solid H[Bi(MPA)<sub>2</sub>] and of H<sub>2</sub>MPA

Cartesian coordinates for optimized:

Bi(HMPA)(H<sub>2</sub>O)<sub>3</sub>\*H<sub>2</sub>O<sup>2+</sup> (M06)

symmetry c1

|    |              |              |              |
|----|--------------|--------------|--------------|
| Bi | -1.030000179 | -0.280482026 | 0.388739906  |
| O  | -1.301267647 | -1.999406477 | 2.203496242  |
| O  | 1.406539848  | -0.797261205 | 0.470907754  |
| H  | -1.515237661 | -2.937165176 | 2.163466588  |
| H  | 1.888327487  | -1.530428238 | 0.074780246  |
| H  | -1.075296179 | -1.799318412 | 3.117720667  |
| H  | 2.049463233  | -0.264361432 | 0.950294940  |
| O  | -0.687013657 | 1.475085431  | -1.146672724 |
| H  | -0.090657762 | 2.205142506  | -0.957481795 |
| H  | -0.898526073 | 1.476240115  | -2.129382596 |
| S  | -0.372455545 | 1.229779478  | 2.231311171  |
| C  | -1.709891087 | 2.491425720  | 2.124293769  |
| C  | -3.077627137 | 2.025700389  | 2.563478001  |
| C  | -3.770638498 | 1.105624156  | 1.620926525  |
| O  | -5.045280283 | 1.031040940  | 1.813926866  |
| O  | -3.222329597 | 0.453082122  | 0.720919404  |
| H  | -1.730154528 | 2.923411551  | 1.124154374  |
| H  | -1.357583007 | 3.270896385  | 2.799418864  |
| H  | -3.736438595 | 2.884514483  | 2.720376404  |
| H  | -3.037192529 | 1.521661271  | 3.535818846  |
| H  | -5.474027798 | 0.412014784  | 1.202423646  |
| O  | -1.282079961 | 1.388426366  | -3.665301372 |
| H  | -0.658139721 | 1.212168306  | -4.372523905 |
| H  | -2.003497637 | 1.880538196  | -4.062685268 |

Bi(HMPA)(H<sub>2</sub>O)<sub>3</sub>\*H<sub>2</sub>O<sup>2+</sup> (M06/SMD)

symmetry c1

|    |              |              |              |
|----|--------------|--------------|--------------|
| Bi | -0.949477657 | -0.397075430 | 0.486401649  |
| O  | -0.683682248 | -2.222540003 | 2.133122717  |
| O  | 1.430078187  | -0.541025063 | 0.354275668  |
| H  | -0.795624068 | -3.155654992 | 1.918319386  |
| H  | 1.872780181  | -1.250796463 | -0.125002800 |
| H  | -1.082866729 | -2.081976625 | 2.998796336  |
| H  | 2.021280999  | -0.213592805 | 1.042039371  |
| O  | -0.510822264 | 1.541735904  | -0.781363789 |
| H  | 0.385930648  | 1.865082751  | -0.922288979 |
| H  | -0.980057798 | 1.495270886  | -1.656551384 |
| S  | -0.622371661 | 0.920189141  | 2.574667486  |
| C  | -1.639209935 | 2.401338309  | 2.198089718  |
| C  | -3.129991954 | 2.182279676  | 2.283466430  |
| C  | -3.721136602 | 1.375428924  | 1.182455593  |
| O  | -5.022241388 | 1.495123234  | 1.102118120  |
| O  | -3.104323469 | 0.661589348  | 0.395716658  |
| H  | -1.340731148 | 2.808825895  | 1.233671511  |
| H  | -1.334853198 | 3.121254135  | 2.956948465  |
| H  | -3.653170995 | 3.141629108  | 2.303227200  |
| H  | -3.402647722 | 1.685134347  | 3.220532786  |
| H  | -5.397143937 | 0.930420854  | 0.405095174  |
| O  | -1.943869916 | 1.075738278  | -2.916974992 |
| H  | -1.499038397 | 0.834443077  | -3.734074826 |
| H  | -2.627813442 | 1.705506748  | -3.160280942 |

Bi(HMPA)<sub>2</sub>(H<sub>2</sub>O)<sub>2</sub><sup>+</sup> (M06)

symmetry c2

|    |              |              |              |
|----|--------------|--------------|--------------|
| Bi | 0.000000000  | 0.000000000  | 0.366294963  |
| S  | -1.098019881 | -1.312007566 | -1.509603186 |
| C  | -2.746981763 | -1.749403408 | -0.833628466 |
| C  | -3.317472039 | -0.828116558 | 0.245283961  |
| C  | 3.167465112  | -0.610440230 | -0.114501456 |
| O  | 4.197279503  | -1.116192556 | -0.746389664 |
| O  | 2.165197198  | -1.269040318 | 0.123942538  |
| H  | -2.799560443 | -1.000759033 | 1.190978081  |
| H  | -2.720039185 | -2.761886328 | -0.435183316 |
| H  | -4.372237926 | -1.063598914 | 0.389418969  |
| H  | -3.403635312 | -1.749019078 | -1.704063210 |
| H  | 4.006464308  | -2.030502871 | -0.999088348 |
| O  | -0.426701185 | -2.612727661 | 1.462845907  |
| H  | -0.139941793 | -3.080593602 | 2.248896073  |
| H  | -0.203269017 | -3.179108357 | 0.719766985  |

Bi(HMPA)<sub>2</sub>(H<sub>2</sub>O)<sub>2</sub><sup>+</sup> (M06/SMD)

symmetry c1

|    |              |              |              |
|----|--------------|--------------|--------------|
| Bi | -0.001872198 | 0.007141517  | 0.301751822  |
| S  | -1.118346617 | -1.269729910 | -1.610054679 |
| S  | 1.135963509  | 1.319380649  | -1.584599011 |
| C  | -2.737879883 | -1.729151175 | -0.879774924 |
| C  | 2.782018032  | 1.723150663  | -0.877045827 |
| C  | -3.285510963 | -0.807422935 | 0.209745919  |
| C  | 3.294793565  | 0.792919049  | 0.220549888  |
| C  | 3.152454782  | -0.640639654 | -0.153859113 |
| C  | -3.172072811 | 0.632852899  | -0.148644740 |
| O  | 4.215206989  | -1.155419745 | -0.732566062 |
| O  | -4.263869596 | 1.150576139  | -0.669449365 |
| O  | 2.127510222  | -1.286981208 | 0.019080131  |
| O  | -2.150559991 | 1.289963417  | 0.000922347  |
| H  | -2.736747141 | -0.965260676 | 1.141080677  |
| H  | 2.739577883  | 0.959992542  | 1.145885488  |
| H  | -2.673923252 | -2.735479783 | -0.470496450 |
| H  | 2.767393354  | 2.738269915  | -0.484734372 |
| H  | -4.328303575 | -1.062955354 | 0.397253839  |
| H  | 4.341750508  | 1.022829625  | 0.419229892  |
| H  | -3.427506795 | -1.754186091 | -1.723597109 |
| H  | 3.466358059  | 1.707084621  | -1.726252936 |
| H  | 4.069164516  | -2.077058157 | -1.003004438 |
| H  | -4.141164912 | 2.083360992  | -0.917160419 |
| O  | -0.414038836 | -2.498631672 | 1.486345396  |
| O  | 0.409150375  | 2.510396630  | 1.523227488  |
| H  | -0.089737600 | -2.651522749 | 2.378074695  |
| H  | -0.067682647 | 2.711203839  | 2.333584640  |
| H  | -0.053208891 | -3.210914225 | 0.951096767  |
| H  | 0.161083915  | 3.196230836  | 0.897055154  |

Bi(HMPA)<sub>3</sub> (M06)

symmetry c3

|    |              |              |              |
|----|--------------|--------------|--------------|
| Bi | 0.000000000  | 0.000000000  | -0.060948427 |
| H  | 0.660853215  | -3.629023098 | 0.821870325  |
| S  | -2.058471167 | -0.834967459 | 1.325158611  |
| C  | -2.868042394 | -1.845829523 | 0.020629951  |
| C  | -2.384476731 | -3.288097973 | 0.008554065  |
| C  | -0.894683079 | -3.287050664 | -0.139352246 |
| O  | -0.264298048 | -3.937208420 | 0.822083421  |
| O  | -0.319289926 | -2.682906767 | -1.018622296 |
| H  | -2.716949995 | -1.380612420 | -0.954643858 |
| H  | -3.936776133 | -1.814591849 | 0.230508533  |
| H  | -2.825296293 | -3.819290867 | -0.839592831 |
| H  | -2.663532291 | -3.800496619 | 0.927923175  |



Bi(HMPA)<sub>3</sub> (M06/SMD)

symmetry c1

|    |              |              |              |
|----|--------------|--------------|--------------|
| Bi | 0.157450423  | 0.158649420  | -0.035292432 |
| H  | 0.376336971  | -4.628812667 | -0.281851932 |
| H  | 4.226285403  | 2.561082193  | -0.640890540 |
| H  | -4.160739890 | 1.624459850  | -1.108167022 |
| S  | -1.924614181 | -0.449983921 | 1.379259440  |
| S  | 1.788756234  | -1.091507658 | 1.529426015  |
| S  | 0.486030068  | 2.290324624  | 1.379876211  |
| C  | -2.785343228 | -1.612781203 | 0.255749462  |
| C  | 3.082682464  | -1.564690464 | 0.320568996  |
| C  | -0.528610769 | 3.546085664  | 0.510523482  |
| C  | -2.320855323 | -3.043509307 | 0.388584651  |
| C  | 4.174021423  | -0.530568716 | 0.185874783  |
| C  | -2.023886151 | 3.329855119  | 0.546431339  |
| C  | -0.973528319 | -3.292853576 | -0.202285510 |
| C  | 3.728141740  | 0.730311865  | -0.477194858 |
| C  | -2.532399229 | 2.372503623  | -0.478615238 |
| O  | -0.470295265 | -4.473279209 | 0.164753484  |
| O  | 4.511413500  | 1.765387761  | -0.165402505 |
| O  | -3.857311909 | 2.226517693  | -0.411834036 |
| O  | -0.394088935 | -2.547279257 | -0.958558225 |
| O  | 2.795121699  | 0.828576409  | -1.241204598 |
| O  | -1.860234617 | 1.806683867  | -1.312651706 |
| H  | -2.690800639 | -1.268130763 | -0.776041303 |
| H  | 2.628595668  | -1.792309357 | -0.645148384 |
| H  | -0.179681705 | 3.652777995  | -0.516565828 |
| H  | -3.841699145 | -1.546213056 | 0.515572609  |
| H  | 3.509658920  | -2.495885505 | 0.691988964  |
| H  | -0.289825482 | 4.478008446  | 1.022903505  |
| H  | -3.007400576 | -3.718938045 | -0.136648321 |
| H  | 4.993242282  | -0.920214855 | -0.431017950 |
| H  | -2.547843733 | 4.274773705  | 0.365865525  |
| H  | -2.319887701 | -3.368869751 | 1.430591704  |
| H  | 4.612746984  | -0.289793078 | 1.155209473  |
| H  | -2.361436985 | 2.989622157  | 1.528792867  |

Bi(MPA)<sub>2</sub>-polymer<sup>3-</sup> (M06)

symmetry c2

|    |             |              |              |
|----|-------------|--------------|--------------|
| Bi | 0.000000000 | 0.000000000  | -1.384520275 |
| S  | 1.658993630 | 0.878197139  | -3.254522979 |
| C  | 1.716173936 | 2.601432239  | -2.613425258 |
| C  | 0.531856609 | 3.442129709  | -3.048643637 |
| C  | 0.841154870 | -3.103217945 | -2.448908973 |
| O  | 1.806300739 | -3.761433528 | -2.819669736 |

|    |              |              |              |
|----|--------------|--------------|--------------|
| O  | 0.869625236  | -2.180605347 | -1.555428074 |
| H  | 0.418671991  | 3.404613726  | -4.147721899 |
| H  | 2.655649224  | 3.040112347  | -2.995313876 |
| H  | 0.704519215  | 4.509731842  | -2.802706074 |
| H  | 1.814434925  | 2.583551345  | -1.512306908 |
| Bi | 6.618070264  | 1.077859745  | -0.272214084 |
| S  | 6.465281109  | -0.978100086 | -1.795679588 |
| C  | 4.627912898  | -1.159814220 | -1.942231311 |
| C  | 3.816051933  | -1.111531693 | -0.658515608 |
| C  | 3.430053586  | 0.284742745  | -0.211108422 |
| O  | 2.281407548  | 0.528892298  | 0.153531001  |
| O  | 4.351725601  | 1.196488852  | -0.230326623 |
| H  | 4.371618781  | -1.597401679 | 0.167284782  |
| H  | 4.492102005  | -2.149282800 | -2.410393833 |
| H  | 2.884754705  | -1.682619439 | -0.819594482 |
| H  | 4.238525651  | -0.417900340 | -2.660883648 |
| O  | 8.940527650  | 0.684778356  | -0.243964318 |
| S  | 6.649599630  | -0.147763422 | 2.026245128  |
| C  | 9.826079725  | 0.311705772  | 0.606342323  |
| C  | 9.403197669  | -0.696232429 | 1.686805357  |
| C  | 8.017027078  | -1.300099853 | 1.602210315  |
| O  | 10.993361916 | 0.685840133  | 0.623093293  |
| H  | 7.919574253  | -2.135543566 | 2.317922699  |
| H  | 7.820306930  | -1.722985498 | 0.598803447  |
| H  | 10.168971765 | -1.495502002 | 1.657341010  |
| H  | 9.541956651  | -0.194726351 | 2.662966300  |

H<sub>5</sub>O<sub>2</sub><sup>+</sup> (M06)

symmetry c2

|   |              |              |              |
|---|--------------|--------------|--------------|
| O | -1.182809413 | 0.144912166  | -0.017541293 |
| H | 0.000000000  | 0.000000000  | 0.036588158  |
| H | -1.710927303 | -0.537649888 | -0.445474910 |
| H | -1.661263003 | 0.517503585  | 0.730188953  |

H<sub>5</sub>O<sub>2</sub><sup>+</sup> (M06/SMD)

symmetry c1

|   |              |              |              |
|---|--------------|--------------|--------------|
| O | -1.175102955 | 0.163625827  | -0.067633312 |
| O | 1.180898884  | -0.179182516 | -0.047664227 |
| H | -0.004064368 | -0.023457911 | -0.003754388 |
| H | -1.720704631 | -0.561877822 | -0.395006501 |
| H | 1.666708760  | 0.585227972  | -0.381398152 |
| H | -1.576231226 | 0.532205801  | 0.728637313  |
| H | 1.628495536  | -0.516541351 | 0.737752926  |

H<sub>2</sub>MPA (M06)

symmetry c1

|   |              |             |              |
|---|--------------|-------------|--------------|
| S | -7.535523332 | 2.902229871 | 0.255709827  |
| H | -7.505984344 | 1.996854343 | -0.738098237 |
| C | -5.865751678 | 3.559178120 | -0.019882324 |
| C | -4.783253831 | 2.530024533 | 0.202580070  |
| C | -3.404433944 | 3.105753162 | 0.073715375  |
| O | -2.466335537 | 2.152312086 | 0.194057932  |
| O | -3.140072264 | 4.259830884 | -0.105889163 |
| H | -5.761883371 | 4.381828170 | 0.687390080  |
| H | -5.795961724 | 3.997162488 | -1.014618589 |
| H | -4.873918280 | 1.697240277 | -0.500243565 |
| H | -4.872369920 | 2.077484582 | 1.193917427  |
| H | -1.610707809 | 2.590343821 | 0.112273901  |

H<sub>2</sub>MPA (M06/SMD)

symmetry c1

|   |              |             |              |
|---|--------------|-------------|--------------|
| S | -7.538538656 | 2.874740614 | 0.217090285  |
| H | -7.436037094 | 1.981320331 | -0.777103829 |
| C | -5.873757099 | 3.573638151 | 0.000897624  |
| C | -4.788900489 | 2.547537737 | 0.221721634  |
| C | -3.411093277 | 3.106132515 | 0.061497884  |
| O | -2.478398289 | 2.150905369 | 0.192313545  |
| O | -3.139558521 | 4.259488436 | -0.156081492 |
| H | -5.803974889 | 4.383135790 | 0.727531289  |
| H | -5.798185896 | 4.023599167 | -0.987930291 |
| H | -4.894606643 | 1.705776372 | -0.468476509 |
| H | -4.858776937 | 2.109617968 | 1.221267561  |
| H | -1.594368245 | 2.534349888 | 0.088185031  |

Bi(H<sub>2</sub>O)<sub>6</sub><sup>3+</sup> (M06)

symmetry c1

|    |              |              |              |
|----|--------------|--------------|--------------|
| Bi | 0.286934782  | 0.186921476  | -0.082449676 |
| O  | 0.268052037  | -1.731973892 | 1.302387658  |
| O  | 1.535473488  | 1.155083545  | 1.796338410  |
| O  | -1.632009535 | 0.715514448  | 1.212223711  |
| H  | -0.175261408 | -2.577368968 | 1.133934339  |
| H  | 2.494464721  | 1.288763047  | 1.849005714  |
| H  | -2.185818097 | 1.502871193  | 1.097297442  |
| H  | 0.803861690  | -1.848909374 | 2.102607964  |
| H  | 1.167896364  | 1.632916937  | 2.554434816  |
| H  | -1.967696083 | 0.246135932  | 1.990608142  |
| O  | -1.317602233 | -1.100491663 | -1.257419516 |
| O  | 1.785433052  | -1.016356507 | -1.614567646 |
| O  | -0.604123274 | 2.014991375  | -1.439163067 |
| H  | -2.272661791 | -1.151930130 | -1.101185959 |

|   |              |              |              |
|---|--------------|--------------|--------------|
| H | 2.265500373  | -1.839122581 | -1.437975316 |
| H | -0.283824674 | 2.929818503  | -1.469011228 |
| H | -1.125582362 | -1.652484959 | -2.031171690 |
| H | 2.171346116  | -0.665003701 | -2.431694473 |
| H | -1.228183822 | 1.934235665  | -2.175529084 |

Bi(H<sub>2</sub>O)<sub>6</sub><sup>3+</sup> (M06/SMD)

symmetry c1

|    |              |              |              |
|----|--------------|--------------|--------------|
| Bi | -0.134185830 | 0.011101527  | 0.044169879  |
| O  | 0.556571739  | -2.031316323 | 1.108391069  |
| O  | 1.465931849  | 1.236052542  | 1.286679657  |
| O  | -1.810188008 | 0.976766339  | 1.507971928  |
| H  | 0.090649359  | -2.863071337 | 0.961042737  |
| H  | 2.414725576  | 1.067433282  | 1.336805353  |
| H  | -2.396218643 | 1.711060007  | 1.289294810  |
| H  | 0.935384013  | -2.051359639 | 1.995302550  |
| H  | 1.206681719  | 1.801290357  | 2.024404804  |
| H  | -2.257437783 | 0.410476872  | 2.147629690  |
| O  | -1.564112561 | -1.367381060 | -1.290344421 |
| O  | 1.646080353  | -0.678578387 | -1.321346530 |
| O  | -0.254223322 | 1.900094847  | -1.349238756 |
| H  | -2.527979653 | -1.352753288 | -1.255455322 |
| H  | 2.235527198  | -1.408354570 | -1.094280158 |
| H  | 0.216172382  | 2.726020407  | -1.179600856 |
| H  | -1.288970301 | -1.915176088 | -2.034735656 |
| H  | 2.090695847  | -0.095897890 | -1.948712718 |
| H  | -0.625103933 | 1.923592402  | -2.240722192 |

Bi(HMPA)<sub>2</sub> (M06)

Symmetry c2

|    |              |              |              |
|----|--------------|--------------|--------------|
| Bi | 0.000000000  | 0.000000000  | -0.238040877 |
| S  | 1.210121502  | 1.240825811  | 1.567262058  |
| S  | -1.210121502 | -1.240825811 | 1.567262058  |
| C  | 1.423711131  | 2.937369409  | 0.898923183  |
| C  | -1.423711131 | -2.937369409 | 0.898923183  |
| C  | 0.520525784  | 3.369372513  | -0.254591138 |
| C  | -0.520525784 | -3.369372513 | -0.254591138 |
| C  | -0.924772235 | 3.107381484  | 0.013964530  |
| C  | 0.924772235  | -3.107381484 | 0.013964530  |
| O  | -1.586792396 | 4.145666305  | 0.451010784  |
| O  | 1.586792396  | -4.145666305 | 0.451010784  |
| O  | -1.457220054 | 2.015521394  | -0.135537146 |
| O  | 1.457220054  | -2.015521394 | -0.135537146 |
| H  | 0.798469365  | 2.839139353  | -1.169270367 |
| H  | -0.798469365 | -2.839139353 | -1.169270367 |
| H  | 2.459738118  | 3.056421944  | 0.588170856  |

|   |              |              |              |
|---|--------------|--------------|--------------|
| H | -2.459738118 | -3.056421944 | 0.588170856  |
| H | 0.671183464  | 4.434041540  | -0.433416983 |
| H | -0.671183464 | -4.434041540 | -0.433416983 |
| H | 1.258712737  | 3.585354743  | 1.760294436  |
| H | -1.258712737 | -3.585354743 | 1.760294436  |
| H | -2.503381090 | 3.896515468  | 0.639742707  |
| H | 2.503381090  | -3.896515468 | 0.639742707  |

Bi(HMPA)<sub>2</sub> (M06/SMD)

symmetry c1

|    |              |              |              |
|----|--------------|--------------|--------------|
| Bi | 0.025402842  | -0.008683603 | -0.358234242 |
| S  | -1.400721872 | -1.139145772 | 1.396265752  |
| S  | 1.308327628  | 1.202446353  | 1.455996662  |
| C  | -1.500053549 | -2.877344574 | 0.810878610  |
| C  | 1.464894686  | 2.915810998  | 0.811201774  |
| C  | -0.481034955 | -3.328254387 | -0.228974316 |
| C  | 0.485870417  | 3.326025964  | -0.284900151 |
| C  | 0.934245569  | -3.050650632 | 0.142543914  |
| C  | -0.923854969 | 3.037990593  | 0.092556840  |
| O  | 1.622403329  | -4.099176770 | 0.517491570  |
| O  | -1.563837828 | 4.045500569  | 0.632702922  |
| O  | 1.440022821  | -1.931769412 | 0.102013646  |
| O  | -1.450145068 | 1.938877615  | -0.052780186 |
| H  | -0.658992020 | -2.821784884 | -1.182040934 |
| H  | 0.707049740  | 2.787081745  | -1.209312420 |
| H  | -2.494146794 | -3.041830004 | 0.399555506  |
| H  | 2.477016211  | 3.055632097  | 0.438084229  |
| H  | -0.611955821 | -4.396001609 | -0.402919585 |
| H  | 0.609746091  | 4.389011160  | -0.490294321 |
| H  | -1.409748276 | -3.484329312 | 1.711467944  |
| H  | 1.337603158  | 3.554014499  | 1.686100005  |
| H  | 2.546582583  | -3.873261040 | 0.722361057  |
| H  | -2.464673926 | 3.799840406  | 0.905300685  |

H<sub>7</sub>O<sub>3</sub><sup>+</sup> (M06/SMD)

symmetry c1

|   |              |              |              |
|---|--------------|--------------|--------------|
| H | 1.652539220  | 0.429491801  | 0.005268836  |
| O | 0.853347677  | -0.110333896 | -0.001859323 |
| H | 0.305293516  | -0.068058366 | 0.871836238  |
| H | 0.298190598  | -0.015180500 | -0.858796419 |
| O | -0.558286245 | -0.036544220 | 2.063937521  |
| O | -0.576893178 | 0.053315392  | -2.064061289 |
| H | -0.342958475 | -0.647886017 | 2.774938660  |
| H | -0.523235603 | -0.694308419 | -2.666306444 |
| H | -0.707436039 | 0.820609143  | 2.474286957  |
| H | -0.514909677 | 0.849757329  | -2.599244737 |

$\text{H}_7\text{O}_3^+$  (M06)

symmetry cs

|   |              |              |              |
|---|--------------|--------------|--------------|
| H | 1.704704281  | 0.332417256  | 0.000000000  |
| O | 0.857779832  | -0.123774519 | 0.000000000  |
| H | 0.333692856  | -0.011637773 | -0.878182041 |
| H | 0.333692856  | -0.011637773 | 0.878182041  |
| O | -0.400244612 | 0.055338733  | -2.157062288 |
| O | -0.400244612 | 0.055338733  | 2.157062288  |
| H | -0.492342575 | -0.685178585 | -2.759191491 |
| H | -0.492342575 | -0.685178585 | 2.759191491  |
| H | -0.779521827 | 0.827587380  | -2.579286504 |
| H | -0.779521827 | 0.827587380  | 2.579286504  |

 $\text{Bi}(\text{HMPA})_2^+$  (PBE0)

symmetry c1

|    |              |              |              |
|----|--------------|--------------|--------------|
| Bi | -1.008715198 | -0.342622977 | 0.479473127  |
| O  | -1.283139688 | -2.025638714 | 2.233532815  |
| O  | 1.440378902  | -0.719692889 | 0.444188649  |
| H  | -1.441015415 | -2.974975920 | 2.164482815  |
| H  | 1.937030317  | -1.414354656 | -0.003915282 |
| H  | -1.081215323 | -1.828076651 | 3.155812097  |
| H  | 2.073426731  | -0.208872900 | 0.962080532  |
| O  | -0.722797666 | 1.498993451  | -1.121227507 |
| H  | 0.015751919  | 2.117579009  | -1.081524361 |
| H  | -1.076110626 | 1.535948517  | -2.018421207 |
| S  | -0.373490575 | 1.167150256  | 2.295558589  |
| C  | -1.668284281 | 2.457080336  | 2.171648467  |
| C  | -3.076439661 | 2.019306120  | 2.520419077  |
| C  | -3.740057802 | 1.149131169  | 1.509793426  |
| O  | -5.027711379 | 1.149353992  | 1.578625319  |
| O  | -3.150843469 | 0.461091740  | 0.653850941  |
| H  | -1.625057838 | 2.928875740  | 1.190429145  |
| H  | -1.335891643 | 3.198728999  | 2.899691424  |
| H  | -3.714819781 | 2.896282958  | 2.662810791  |
| H  | -3.107609158 | 1.481501751  | 3.475484989  |
| H  | -5.436033433 | 0.554873842  | 0.928052685  |

 $\text{Bi}(\text{HMPA})_2^+$  (PBE0/SMD)

symmetry c1

|    |              |              |              |
|----|--------------|--------------|--------------|
| Bi | -0.968711884 | -0.387582486 | 0.470039287  |
| O  | -1.383901784 | -1.936333348 | 2.254043109  |
| O  | 1.401313158  | -0.611102853 | 0.333307450  |
| H  | -1.547042236 | -2.883068457 | 2.167919868  |
| H  | 1.828091023  | -1.332779093 | -0.143992582 |
| H  | -1.153123194 | -1.733715651 | 3.167787854  |

|   |              |              |              |
|---|--------------|--------------|--------------|
| H | 2.069925254  | -0.129854924 | 0.834280803  |
| O | -0.644356175 | 1.556720730  | -0.913962851 |
| H | 0.243268357  | 1.909339586  | -1.057506106 |
| H | -1.105472037 | 1.593885527  | -1.761640037 |
| S | -0.402228995 | 1.107573869  | 2.365888783  |
| C | -1.654842793 | 2.417332045  | 2.152116941  |
| C | -3.075302124 | 2.022870423  | 2.492559893  |
| C | -3.714759647 | 1.117206196  | 1.505141159  |
| O | -5.011215152 | 1.013182421  | 1.631398344  |
| O | -3.121979677 | 0.495228454  | 0.616645836  |
| H | -1.587277317 | 2.821768890  | 1.142475104  |
| H | -1.328938562 | 3.201603268  | 2.836223110  |
| H | -3.704581287 | 2.915344564  | 2.560544610  |
| H | -3.142463742 | 1.537018773  | 3.472372334  |
| H | -5.399046249 | 0.407025240  | 0.975203623  |

H<sub>7</sub>O<sub>3</sub><sup>+</sup> (PBE0/SMD)

symmetry c1

|   |              |              |              |
|---|--------------|--------------|--------------|
| H | 1.647395373  | 0.429008175  | 0.002910197  |
| O | 0.856589242  | -0.123791925 | -0.004367411 |
| H | 0.287504211  | -0.017965978 | -0.873370291 |
| H | 0.292412448  | -0.059941211 | 0.875694355  |
| O | -0.575059146 | 0.052296829  | -2.009028617 |
| O | -0.559882760 | -0.036385958 | 2.013250286  |
| H | -0.510171044 | -0.694138144 | -2.614458624 |
| H | -0.334167460 | -0.647811124 | 2.723543259  |
| H | -0.512508511 | 0.855899185  | -2.536731088 |
| H | -0.706460558 | 0.823692397  | 2.422557933  |

H<sub>7</sub>O<sub>3</sub><sup>+</sup> (PBE0)

symmetry cs

|   |              |              |              |
|---|--------------|--------------|--------------|
| H | 1.692095732  | 0.380537333  | 0.000000000  |
| O | 0.868034347  | -0.116835871 | 0.000000000  |
| H | 0.324683222  | -0.008348324 | -0.883782183 |
| H | 0.324683222  | -0.008348324 | 0.883782183  |
| O | -0.464005346 | 0.036554511  | -2.074615667 |
| O | -0.464005346 | 0.036554511  | 2.074615667  |
| H | -0.494209096 | -0.702036661 | -2.688370830 |
| H | -0.494209096 | -0.702036661 | 2.688370830  |
| H | -0.703707923 | 0.832410866  | -2.555603312 |
| H | -0.703707923 | 0.832410866  | 2.555603312  |
